# Supplementary material for: Thermogenic adipocytes promote HDL turnover and reverse cholesterol transport
Source: PubMed Central journal article supplement (PMC5399294; doi:10.1038/ncomms15010), 2017-04-19
Supplement: ncomms15010-s1.pdf [file ncomms15010-s1.pdf]

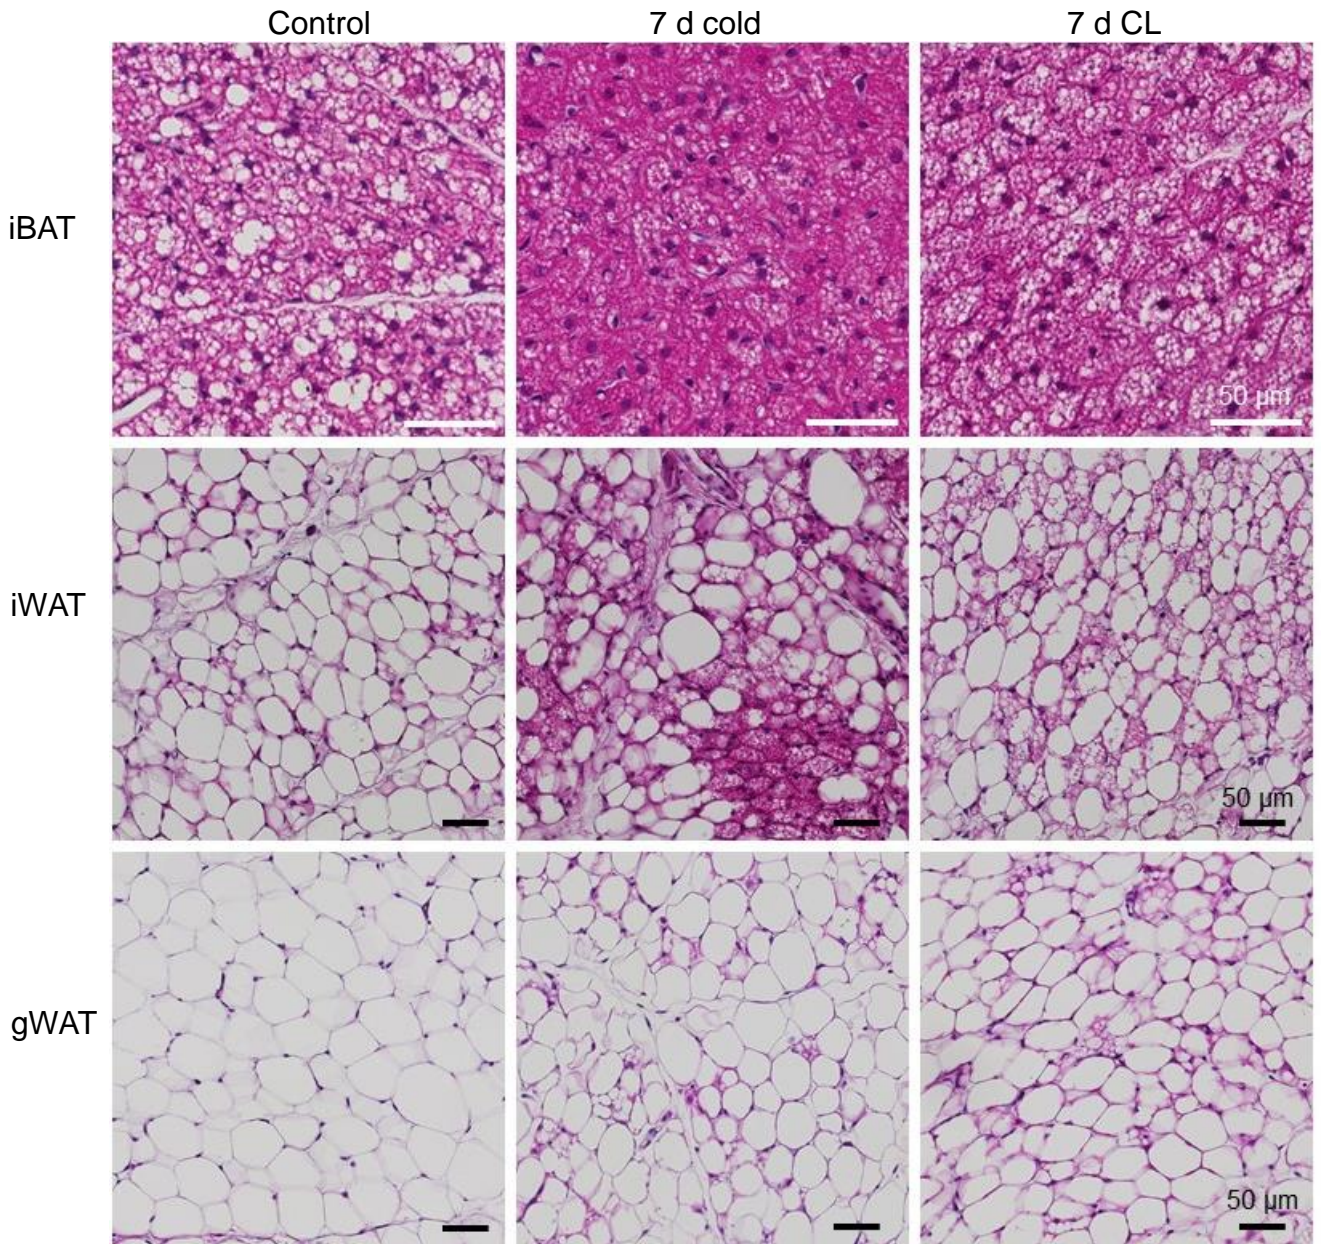

**Supplementary Figure 1. Histology of adipose tissues after cold or  $\beta$ 3-adrenergic receptor stimulation.** C57BL/6J wild-type mice were housed at 4 °C or injected daily with  $\beta$ 3-adrenergic receptor agonist CL316,243 (CL) for 7 days. Interscapular brown adipose tissue (iBAT), inguinal white adipose tissue (iWAT) and gonadal white adipose tissue (gWAT) were dissected, fixed in paraformaldehyde and paraffin sections were HE-stained. Bar = 50  $\mu$ m.

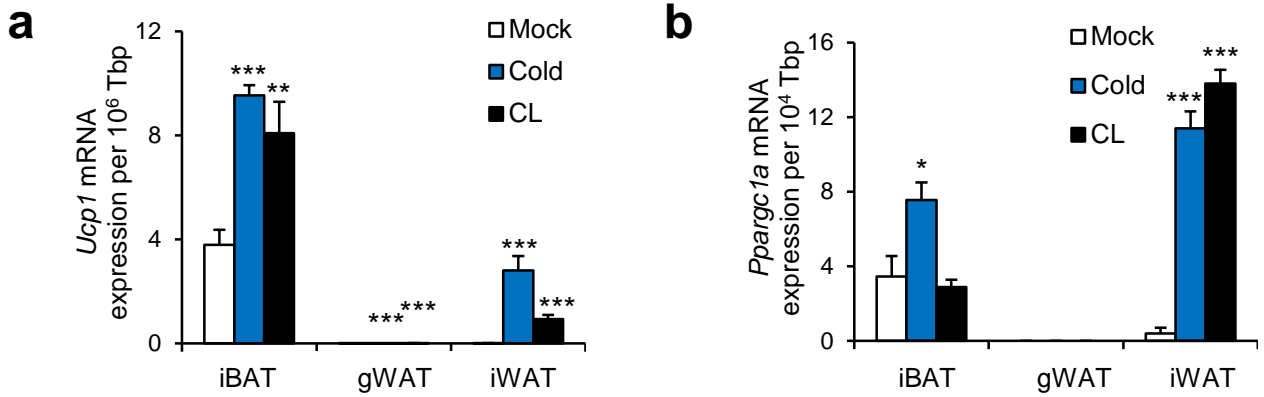

**Supplementary Figure 2. BAT activation and WAT browning indicated by increased *Ucp1* and *Ppargc1a* expression.** C57BL6/J wild-type mice were exposed to 4 °C or treated with CL316,243 (CL) for 7 days. (a) *Ucp1* and (b) *Ppargc1a* gene expression were determined in interscapular brown adipose tissue (iBAT), inguinal white adipose tissue (iWAT) and gonadal white adipose tissue (gWAT). Values are means  $\pm$  s.e.m. (n=5 per group). Significance was calculated using unpaired two-tailed Student's t-test. \* $P \leq 0.05$ , \*\* $P \leq 0.01$ , \*\*\* $P \leq 0.001$ , versus mock.

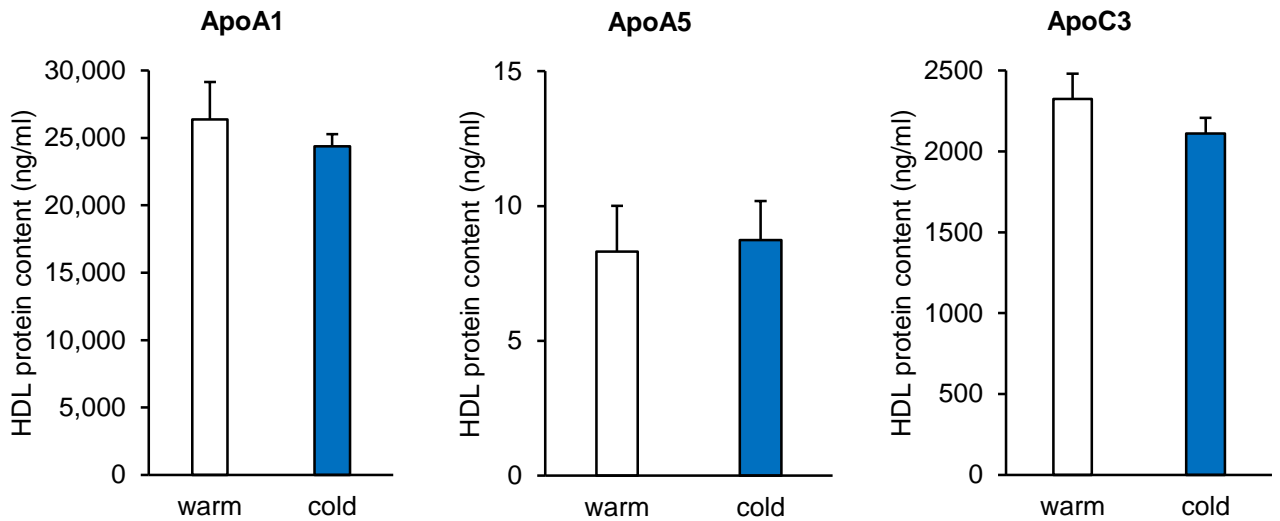

**Supplementary Figure 3. Apolipoprotein levels in isolated HDL are unchanged upon cold exposure.** C57Bl/6J wild-type mice were housed under thermoneutral (warm) or cold conditions for 7 days. HDL were isolated by FPLC from plasma samples of fasted mice (n=4 per group) and apolipoprotein content of murine ApoA1, ApoA5 and ApoC3 associated with HDL were determined by commercial ELISAs (Cloud Clone Corp, USA). Values are means  $\pm$  s.e.m.

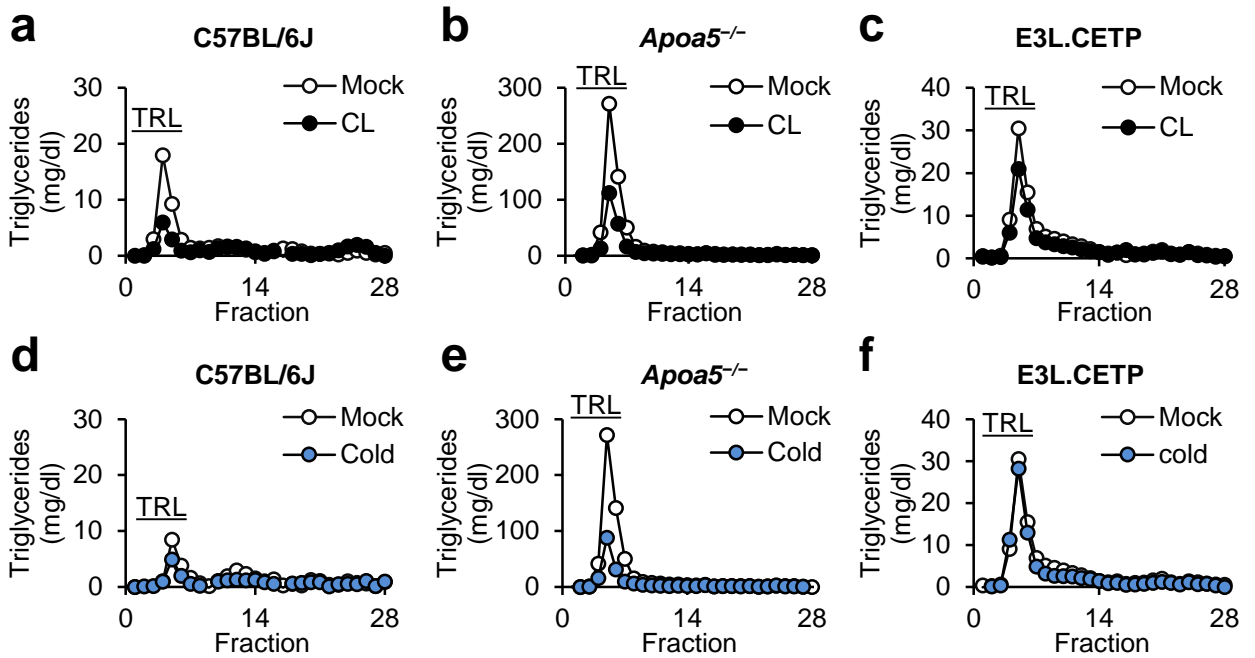

**Supplementary Figure 4. Plasma lipoprotein triglyceride profiles determined by FPLC.** C57BL/6J wild-type mice, *Apoa5*<sup>-/-</sup> mice and E3L.CETP mice were either mock-treated, exposed to cold or treated with CL316,243 (CL) for 7 days. Individual plasma samples were separated by FPLC and triglyceride levels were determined in each fraction. Values are means (n=4-5 per group).

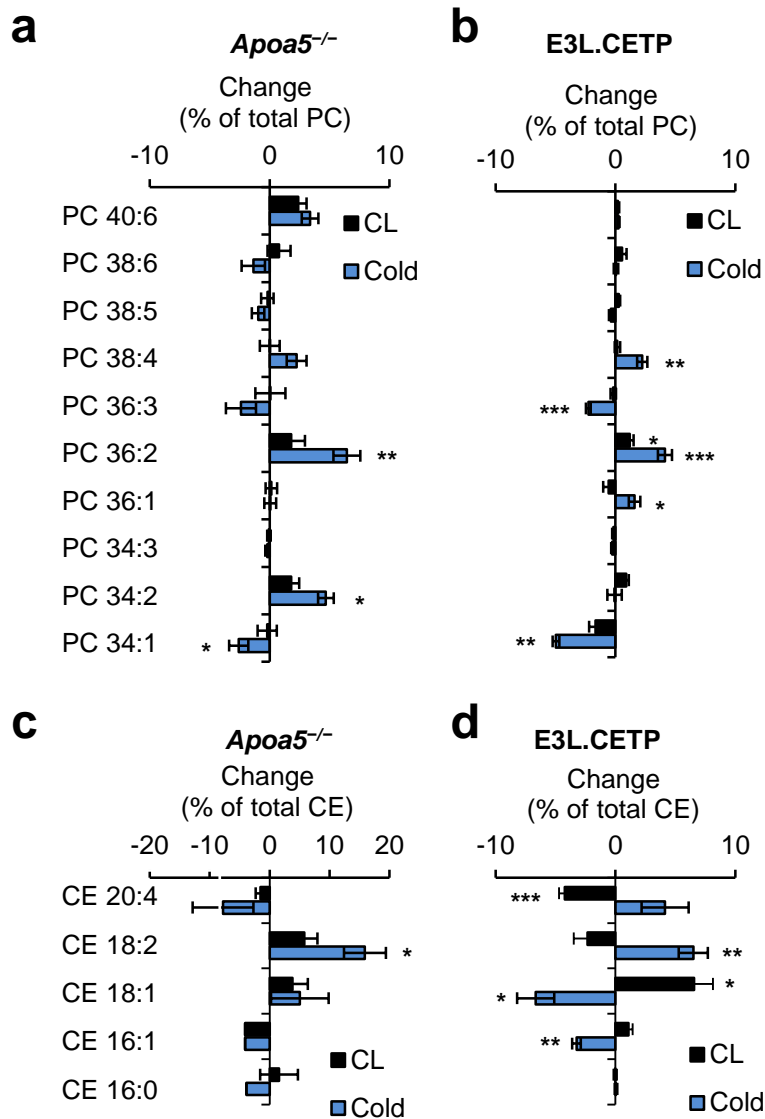

**Supplementary Figure 5. Lipidomic changes of TRL from *Apoa5*<sup>-/-</sup> and E3L.CETP mice after thermogenic activation.** *Apoa5*<sup>-/-</sup> mice and E3L.CETP mice were either mock-treated, exposed to cold or treated with CL316,243 (CL) for 7 days. Lipids of TRL from (a,c) *Apoa5*<sup>-/-</sup> and (b,d) E3L.CETP mice were determined by MS-CID (Lyso-PCs were undetectable). Changes of (a,b) PC and (c,d) CE species are presented relative to mock-treated mice as change of % (weight) of total lipid class. For example, if a PC species has an abundance of 20% of total PC and increases to 25% of total PC after thermogenic stimulation, this is shown as +5%. Calculated values are mean  $\pm$  s.e.m. (n= 4-5 per group). \*  $P < 0.05$ , \*\*  $P < 0.01$ , \*\*\*  $P < 0.001$ , versus mock (Student's t-test).

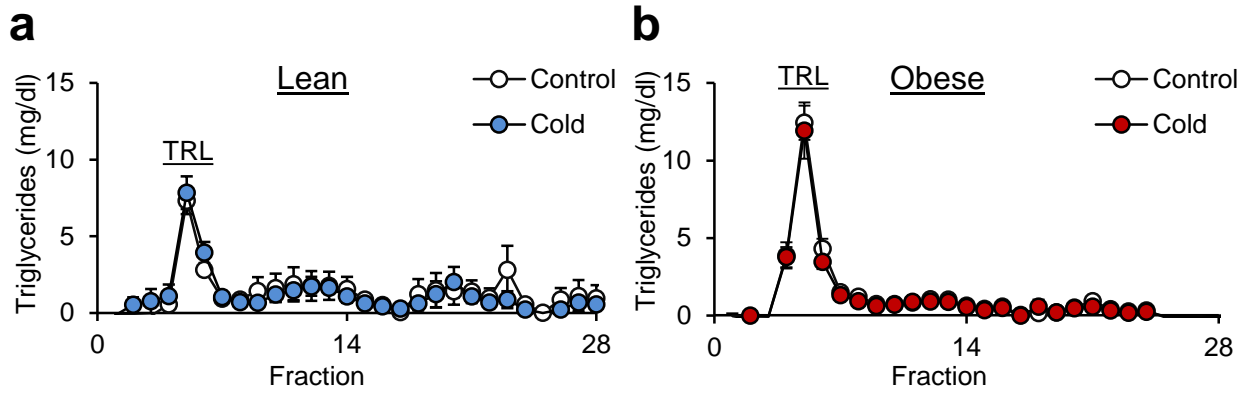

**Supplementary Figure 6. Triglyceride lipoprotein profiles of plasma samples from lean and obese humans before and after cold activation.** Plasma lipoprotein profiles from (a) lean and (b) obese subjects untreated (control) or cold exposed (cold) were determined by FPLC. Values are mean  $\pm$  s.e.m. (n= 10 per group).

**a**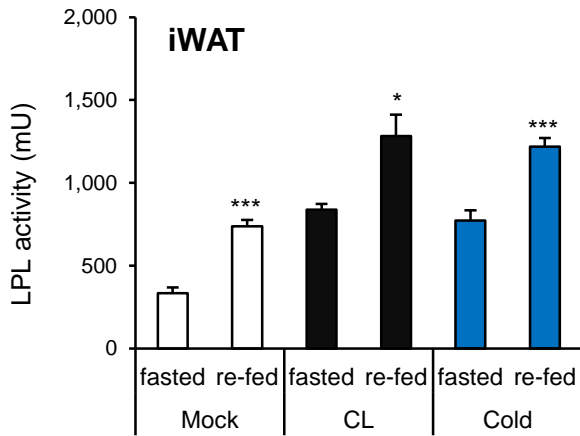**b**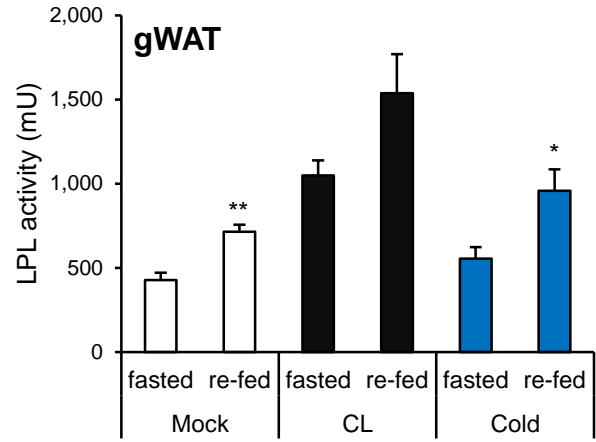**c**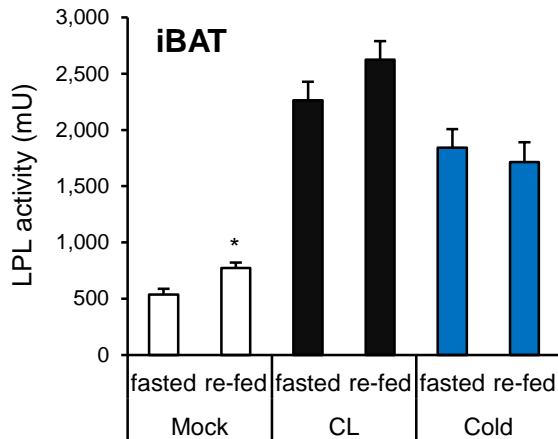

**Supplementary Figure 7. LPL activity in adipose tissues in fasted and re-fed mice after cold or  $\beta$ 3-adrenergic receptor stimulation.** Mice were exposed to 4 °C or treated with 1 mg/kg CL316,243 (CL) for 7 days. Tissues were harvested after a 4 h fasting period or after 4 h fasting and subsequent 3 h re-feeding. LPL activity was determined in tissue homogenates of (a) iWAT, (b) gWAT and (c) iBAT using radioactive substrate as described (1). Values are means  $\pm$  s.e.m. (n=5-6 per group). Significance was calculated using unpaired two-tailed Student's t-test. \* $P \leq 0.05$ , \*\* $P \leq 0.01$ , \*\*\* $P \leq 0.001$ , fasted versus re-fed.

1.) Dijk W, Heine M, Vergnes L, Boon MR, Schaart G, Hesselink MK, Reue K, van Marken Lichtenbelt WD, Olivecrona G, Rensen PC, Heeren J, Kersten S. ANGPTL4 mediates shuttling of lipid fuel to brown adipose tissue during sustained cold exposure. *Elife*. 2015; 4. pii: e08428.



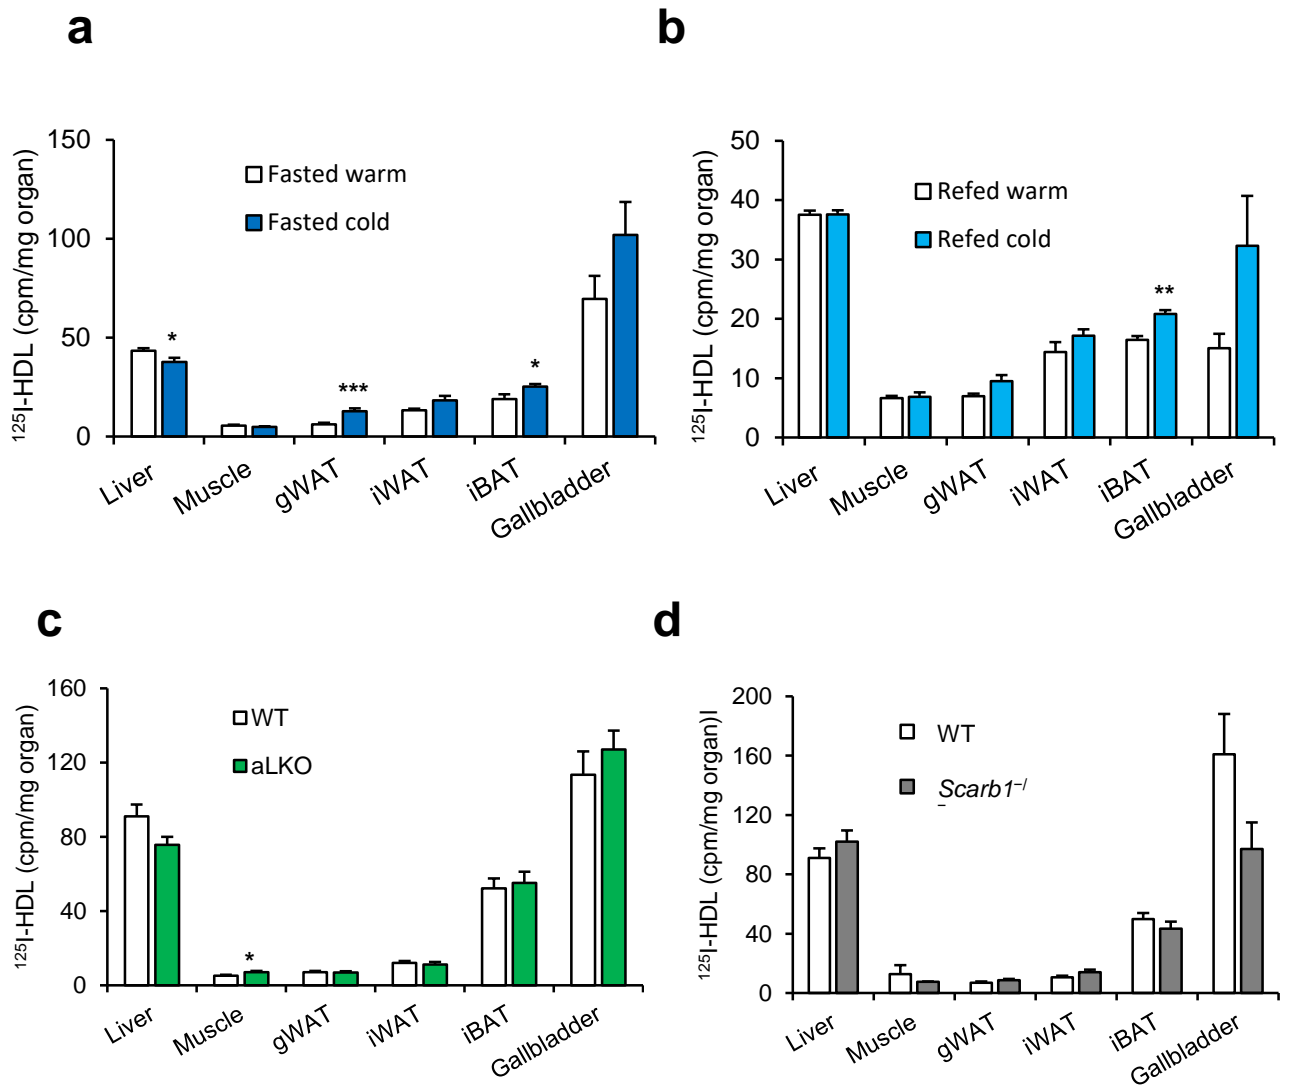

**Supplementary Figure 8. Cold-induced accelerated HDL-turnover is dependent on adipocyte LPL and SR-BI.** <sup>125</sup>I-protein shell- and <sup>3</sup>H-cholesterol core-labeled HDL were injected into fasted (a) and refeed (b) C57BL/6J wild-type mice (WT) which had been either cold-exposed for 7 days (cold) or kept under control conditions at 28°C (warm). Double-labeled HDL were also injected into fasted mice with adipocyte-specific LPL knockout (aLKO) (c) and *Scarb1*<sup>-/-</sup> mice (d) and WT controls, all cold-treated for 7 days. <sup>125</sup>I-HDL organ uptake was measured 5 h after injection. Values are mean ± s.e.m. (n= 5-7 per group). \*P<0.05, \*\* P<0.01, P<0.001 (Student's t-test).



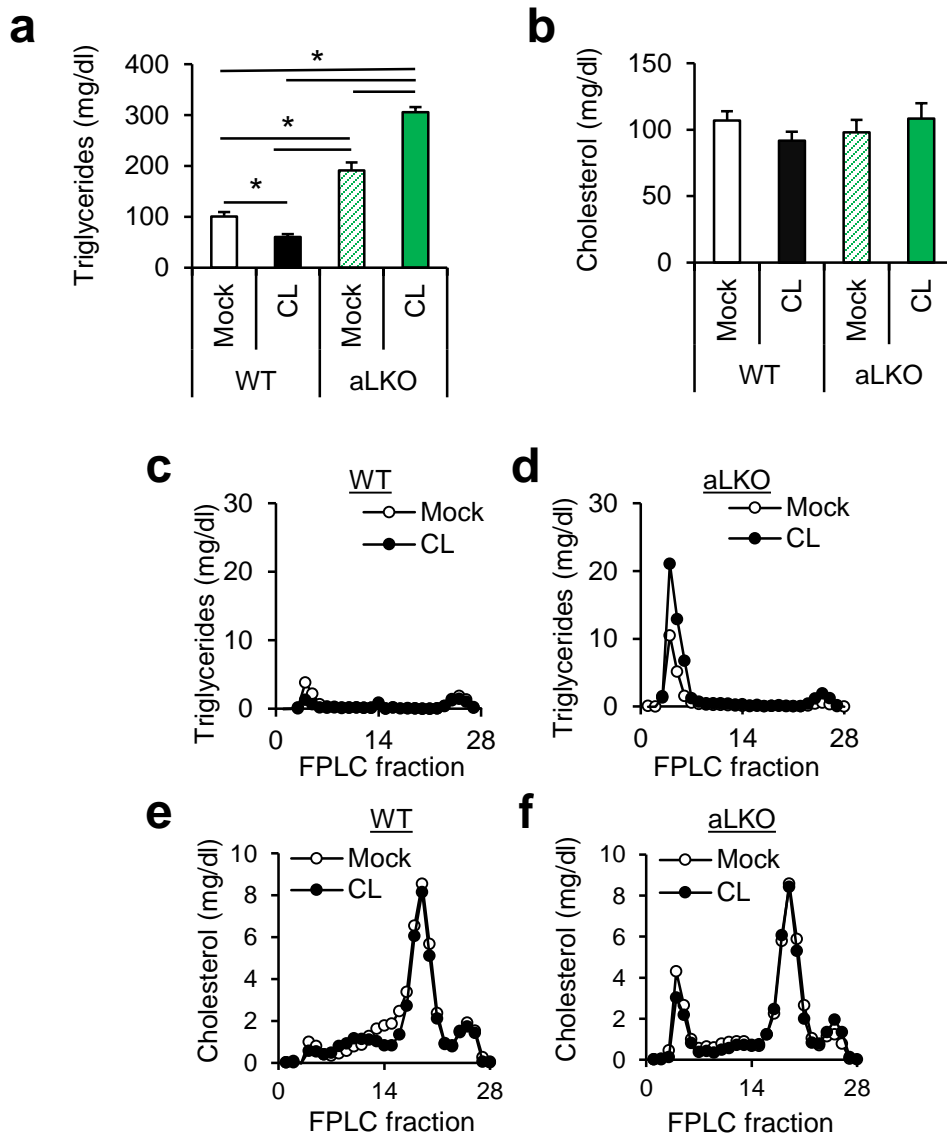

**Supplementary Figure 9. LPL-dependent plasma lipid and lipoprotein profiles after thermogenic activation.** Adipocyte-specific LPL knockout (aLKO) mice and wild-type littermate control (WT) mice were treated for 7 days with the  $\beta$ 3-adrenergic agonist CL316,243 (CL) or saline (mock). Total plasma (a) triglycerides and (b) cholesterol levels. FPLC profiles of (c, d) triglycerides and (e, f) cholesterol of wild type (c, e) and aLKO (d, f) mice. Values are mean  $\pm$  s.e.m. (n= 4 per group). \*P<0.05 (2-way ANOVA). For FPLC analysis, plasma samples from each group were pooled.

**a**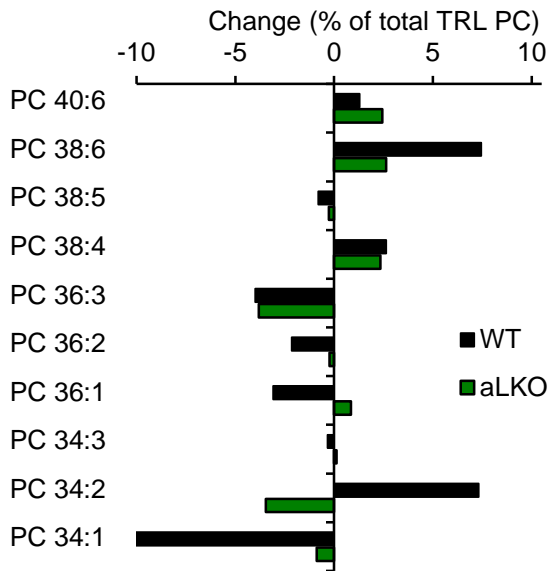**b**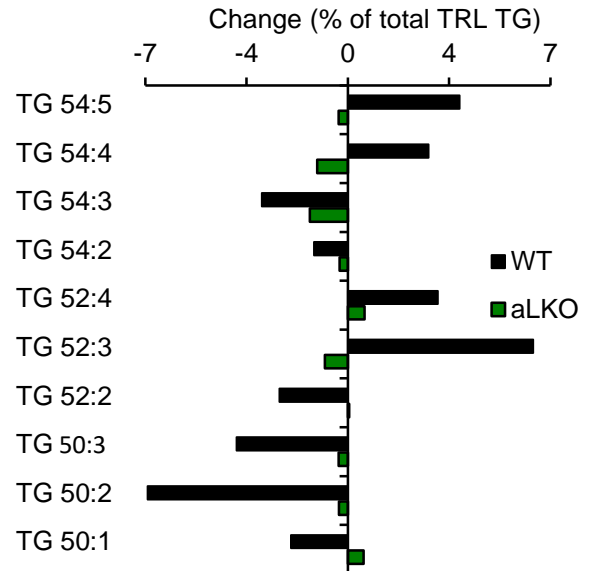**c**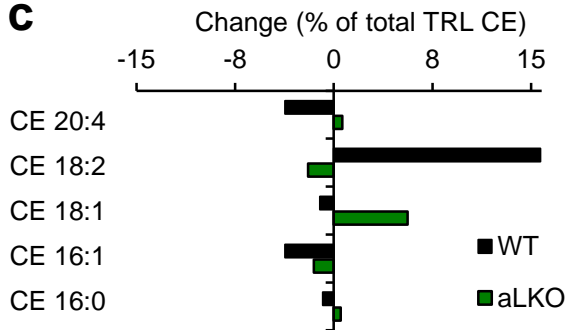

**Supplementary Figure 10. Changes in TRL lipid composition induced by thermogenic activation are dependent on LPL.** Adipocyte-specific LPL knockout (aLKO) mice and wild-type littermate control (WT) mice were treated for 7 days with the  $\beta$ 3-adrenergic agonist CL316,243 (CL) or saline (mock). Lipids of TRL particles isolated by FPLC analysis (fractions 3-6; see supplementary figure 8) were determined MS-CID. Changes of (a) PC, (b) TG and (c) CE species are presented relative to mock-treated mice as change of % (weight) of total lipid class. For example, if a PC species has an abundance of 20% of total PC and increases to 25% of total PC after thermogenic stimulation, this is shown as +5%.

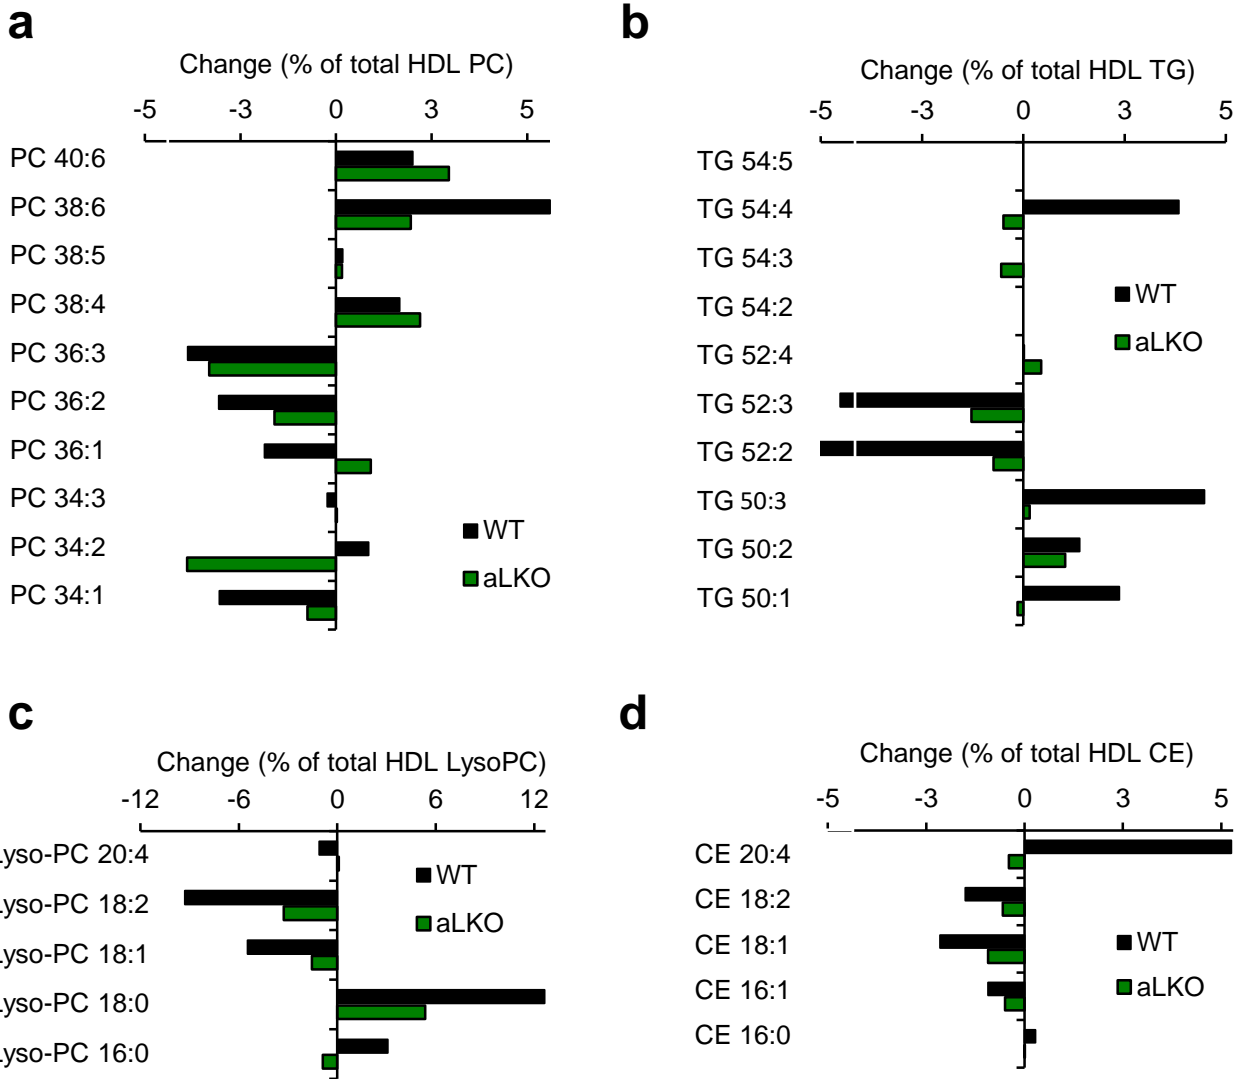

**Supplementary Figure 11. Changes in HDL lipid composition induced by thermogenic activation are dependent on LPL.** Adipocyte-specific LPL knockout (aLKO) mice and wild-type littermate control (WT) mice were treated for 7 days with the  $\beta$ 3-adrenergic agonist CL316,243 (CL) or saline (mock). Lipids of HDL isolated by FPLC analysis (fractions 17-20; see supplementary figure 8) were determined MS-CID. Changes of (a) PC, (b) TG, (c) Lyso-PC and (d) CE species are presented relative to mock-treated mice as change of % (weight) of total lipid class. For example, if a PC species has an abundance of 20% of total PC and increases to 25% of total PC after thermogenic stimulation, this is shown as +5%.

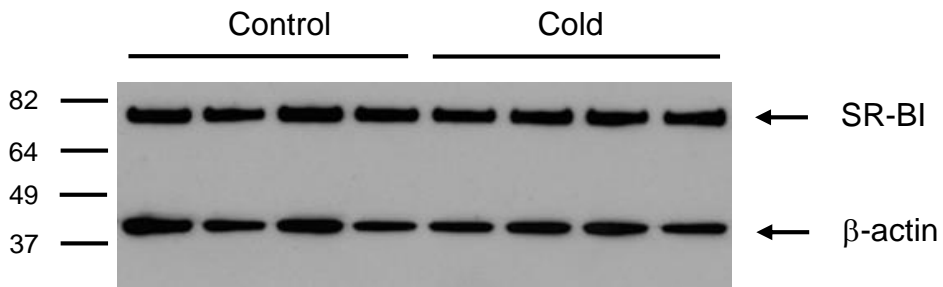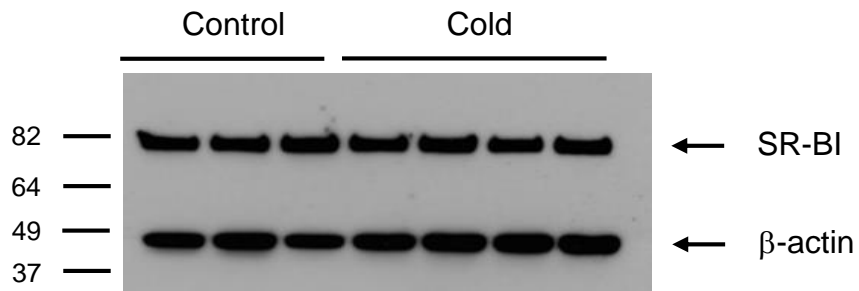

**Supplementary Figure 12. Hepatic SR-BI expression is unaltered after cold exposure in wild type mice.** C57BL/6 wild-type mice were housed at warm conditions (control) or exposed to cold for 7 days. Western blot of liver membrane fractions from two independent experiments are shown (n=3-4 per group). Molecular weights are given in kDa.

|    | <b>Compound</b>                                        | <b>Product Number</b> | <b>Supplier</b>     | <b>Purity (%)</b> | <b>Concentration in extract (µg/ml)</b> |
|----|--------------------------------------------------------|-----------------------|---------------------|-------------------|-----------------------------------------|
| 1  | 1,2-Dipentadecanoyl-sn-glycero-3-phosphatidylcholine   | P7285                 | Sigma aldrich       | ≥ 99              | 6.25                                    |
| 2  | Cholest-5-en-3β-yl heptadecanoate                      | 110864                | Avanti polar lipids | ≥ 99              | 31.25                                   |
| 3  | Glyceriltritridecanoate                                | T7517                 | Sigma aldrich       | ≥ 99              | 6.25                                    |
| 4  | N-Heptadecanoyl-D-erythro-sphingosine                  | 860517                | Avanti polar lipids | ≥ 99              | 6.25                                    |
| 5  | 1-Heptadecanoyl-2-hydroxy-sn-glycero-3- phosphocholine | 110686                | Avanti polar lipids | ≥ 99              | 6.25                                    |
| 6  | 1,2-diheptadecanoyl-sn-glycero-3-phosphoethanolamine   | 110886                | Avanti polar lipids | ≥ 99              | 6.25                                    |
| 7  | 1-pentadecyl-3-(9Z-octadecenyl)-rac-glycerol           | 110593                | Avanti polar lipids | ≥ 99              | 6.25                                    |
| 8  | 1,3(d5)-Dipentadecanoyl-glycerol                       | 110536                | Avanti polar lipids | ≥ 99              | 6.25                                    |
| 9  | N-Heptadecanoyl-D-erythro-sphingosylphosphorylcholine  | 860585P               | Avanti polar lipids | ≥ 99              | 6.25                                    |
| 10 | 1,2-Di-O-tridecyl-sn-glycero-3-phosphocholine          | 999988P               | Avanti polar lipids | ≥ 99              | 6.25                                    |
| 11 | 1,2-Ditetradecanoyl-sn-glycero-3-phospho-L-serine      | 840033                | Avanti polar lipids | ≥ 99              | 6.25                                    |
| 12 | 1,2-Diheptadecanoyl-sn-glycero-3-phosphate             | 830856P               | Avanti polar lipids | ≥ 99              | 6.25                                    |
| 13 | Heptadecanoic acid                                     | H3500                 | Sigma aldrich       | ≥ 98              | 13.5                                    |

**Suppl. Table 1: Constituent compounds serving as internal standards for high resolution lipidomic measurements**

| Lipid species | Fatty acid composition *          | Precursor ion (measured) m/z |          | Product ions (measured) m/z |        |        |        |
|---------------|-----------------------------------|------------------------------|----------|-----------------------------|--------|--------|--------|
|               |                                   |                              |          |                             |        |        |        |
| PC 40:6       | 18:0/22:6                         | [M-H] <sup>-</sup>           | 832.5861 | 283.27                      | 327.21 |        |        |
| PC 38:6       | 18:2/20:4                         | [M-H] <sup>-</sup>           | 804.5548 | 303.22                      | 279.22 |        |        |
| PC 38:5       | 20:4/18:1                         | [M-H] <sup>-</sup>           | 806.5704 | 303.24                      | 281.25 |        |        |
| PC 38:4       | 20:4/18:0                         | [M-H] <sup>-</sup>           | 808.5861 | 303.24                      | 283.24 |        |        |
| PC 36:3       | 18:1/18:2                         | [M-H] <sup>-</sup>           | 782.5705 | 281.25                      | 279.24 |        |        |
| PC 36:2       | 18:2/18:0,<br>18:1/18:1           | [M-H] <sup>-</sup>           | 784.5861 | 279.24                      | 281.24 | 283.24 |        |
| PC 36:1       | 18:1/18:0                         | [M-H] <sup>-</sup>           | 786.6018 | 281.25                      | 283.27 |        |        |
| PC 34:3       | no MS/MS                          | [M-H] <sup>-</sup>           | 754.5392 |                             |        |        |        |
| PC 34:2       | 18:2/16:0                         | [M-H] <sup>-</sup>           | 756.5548 | 280.23                      | 255.24 |        |        |
| PC 34:1       | 18:1/16:0                         | [M-H] <sup>-</sup>           | 758.5705 | 281.25                      | 255.24 |        |        |
| TG 50:1       | 16:0/16:0/18:1                    | [M+NH4] <sup>+</sup>         | 850.7858 | 577.51                      | 551.50 |        |        |
| TG 50:2       | 18:1/16:1/16:0,<br>18:1/18:1/14:0 | [M+NH4] <sup>+</sup>         | 848.7701 | 549.47                      | 575.50 | 577.51 | 603.53 |
| TG 50:3       | 18:1/16:1/16:1                    | [M+NH4] <sup>+</sup>         | 846.7754 | 547.47                      | 575.50 |        |        |
| TG 52:2       | 18:1/18:1/16:0                    | [M+NH4] <sup>+</sup>         | 876.8014 | 577.51                      | 603.53 |        |        |
| TG 52:3       | 18:1/18:1/16:1                    | [M+NH4] <sup>+</sup>         | 874.7854 | 575.50                      | 603.53 |        |        |
| TG 52:4       | 16:1/18:1/18:2                    | [M+NH4] <sup>+</sup>         | 872.7701 | 601.51                      | 573.48 | 575.50 |        |
| TG 54:3       | 18:1/18:1/18:1                    | [M+NH4] <sup>+</sup>         | 902.8170 | 603.53                      |        |        |        |
| TG 54:4       | 18:1/18:1/18:2                    | [M+NH4] <sup>+</sup>         | 900.8014 | 601.51                      | 603.53 |        |        |
| TG 54:5       | 18:1/8:2/18:2                     | [M+NH4] <sup>+</sup>         | 898.7857 | 599.50                      | 601.51 |        |        |
| TG 56:6       | no MS/MS                          | [M+NH4] <sup>+</sup>         | 924.8014 |                             |        |        |        |
| TG 56:7       | no MS/MS                          | [M+NH4] <sup>+</sup>         | 922.7857 |                             |        |        |        |
| TG 56:8       | no MS/MS                          | [M+NH4] <sup>+</sup>         | 920.7701 |                             |        |        |        |
| TG 58:9       | no MS/MS                          | [M+NH4] <sup>+</sup>         | 946.7857 |                             |        |        |        |

\* sn-position not determined

**Suppl. Table 2: Fatty acid (FA) composition of lipid species esterified with more than 2 FAs**
